# Supplementary material for: Inequalities in health-related quality of life according to age, gender, educational level, social class, body mass index and chronic diseases using the Spanish value set for Euroquol 5D-5L questionnaire
Source: Springer Nature journal article supplement (doi:10.1186/s12955-019-1134-9), 2019-04-18
Supplement: MOESM1 [file 16665604]

## SUPPLEMENTARY DATA

**Table 1S.** Mean utilities in men and women by social class and body mass index (BMI) using utilities for EQ-5D-5L.

| <b>Sex</b>   | <b>Social class</b> | <b>BMI &lt; 25<br/>Mean (SD)</b> | <b>BMI 25-30<br/>Mean (SD)</b> | <b>BMI ≥ 30<br/>Mean (SD)</b> | <b>Total<br/>Mean (SD)</b> |
|--------------|---------------------|----------------------------------|--------------------------------|-------------------------------|----------------------------|
| <b>Men</b>   | Total               | 0.9567 (0.12)                    | 0.9474 (0.13)*                 | 0.9145 (0.17)*                | 0.9447 (0.14)              |
|              | Low                 | 0.9470 (0.13)                    | 0.9348 (0.14)*                 | 0.9119 (0.16)*                | 0.9337 (0.14)              |
|              | Middle              | 0.9579 (0.13)                    | 0.9536 (0.12)                  | 0.9151 (0.18)*                | 0.9487 (0.14)              |
|              | High                | 0.9732 (0.08)                    | 0.9651 (0.11)                  | 0.9251 (0.19)*                | 0.9638 (0.12)              |
| <b>Women</b> | Total               | 0.9333 (0.15)                    | 0.8891 (0.18)*                 | 0.8087 (0.25)*                | 0.8998 (0.18)              |
|              | Low                 | 0.9165 (0.17)                    | 0.8759 (0.19)*                 | 0.7966 (0.26)*                | 0.8778 (0.20)              |
|              | Middle              | 0.9405 (0.14)                    | 0.8993 (0.16)*                 | 0.8138 (0.24)*                | 0.9111 (0.17)              |
|              | High                | 0.9518 (0.12)                    | 0.9105 (0.17)*                 | 0.8666 (0.22)*                | 0.9344 (0.15)              |
| <b>Total</b> | Total               | 0.9424 (0.14)                    | 0.9238 (0.15)*                 | 0.8632 (0.22)*                | 0.9216 (0.16)              |
|              | Low                 | 0.9285 (0.16)                    | 0.9091 (0.17)*                 | 0.8528 (0.22)*                | 0.9045 (0.18)              |
|              | Middle              | 0.9473 (0.14)                    | 0.9324 (0.14)*                 | 0.8702 (0.21)*                | 0.9298 (0.15)              |
|              | High                | 0.9597 (0.11)                    | 0.9462 (0.14)*                 | 0.8989 (0.21)*                | 0.9487 (0.13)              |

BMI: Body Mass Index; SD: standard deviation; \*Statistically significant differences in relation to the mean of BMI group <25

**TABLE 2S.** Mean Utilities (SD) in men and women by age groups and BMI categories.

| <b>Sex</b>   | <b>Age</b> | <b>BMI &lt; 25</b> | <b>BMI 25-30</b> | <b>BMI ≥ 30</b> | <b>Total</b>  |
|--------------|------------|--------------------|------------------|-----------------|---------------|
| <b>Men</b>   | Total      | 0.9567 (0.12)      | 0.9474 (0.13)*   | 0.9145 (0.17)*  | 0.9447 (0.14) |
|              | < 30       | 0.9856 (0.07)      | 0.9823 (0.06)    | 0.9652 (0.13)   | 0.9834 (0.07) |
|              | 30-39      | 0.9778 (0.09)      | 0.9746 (0.10)    | 0.9668 (0.08)   | 0.9748 (0.10) |
|              | 40-49      | 0.9619 (0.11)      | 0.9670 (0.09)    | 0.9563 (0.10)   | 0.9634 (0.10) |
|              | 50-59      | 0.9396 (0.14)      | 0.9542 (0.10)    | 0.9102 (0.18)   | 0.9395 (0.14) |
|              | 60-69      | 0.9331 (0.16)      | 0.9454 (0.12)    | 0.9092 (0.16)   | 0.9332 (0.14) |
|              | 70-79      | 0.9212 (0.14)      | 0.8990 (0.18)    | 0.8537 (0.21)   | 0.8935 (0.18) |
|              | 80-89      | 0.8305 (0.22)      | 0.8078 (0.26)    | 0.7351 (0.30)   | 0.8010 (0.25) |
|              | >89        | 0.7040 (0.26)      | 0.7003 (0.27)    | 0.2056 (0.00)   | 0.6882 (0.27) |
| <b>Women</b> | Total      | 0.9333 (0.15)      | 0.8891 (0.18)*   | 0.8087 (0.25)*  | 0.8998 (0.18) |
|              | < 30       | 0.9827 (0.06)      | 0.9826 (0.05)    | 0.9461 (0.17)   | 0.9805 (0.07) |
|              | 30-39      | 0.9709 (0.07)      | 0.9650 (0.07)    | 0.9356 (0.14)   | 0.9661 (0.08) |
|              | 40-49      | 0.9510 (0.11)      | 0.9460 (0.11)    | 0.9206 (0.15)   | 0.9459 (0.12) |
|              | 50-59      | 0.9124 (0.18)      | 0.9003 (0.15)    | 0.8439 (0.21)   | 0.8951 (0.18) |
|              | 60-69      | 0.9154 (0.16)      | 0.8674 (0.18)    | 0.7965 (0.22)   | 0.8696 (0.19) |
|              | 70-79      | 0.8532 (0.18)      | 0.8520 (0.18)    | 0.7218 (0.28)   | 0.8155 (0.22) |
|              | 80-89      | 0.7529 (0.28)      | 0.7311 (0.28)    | 0.6007 (0.31)   | 0.7078 (0.29) |
|              | >89        | 0.5547 (0.32)      | 0.5593 (0.36)    | 0.4246 (0.34)   | 0.5397 (0.34) |
| <b>Total</b> | Total      | 0.9424 (0.14)      | 0.9238 (0.15)*   | 0.8632 (0.22)*  | 0.9216 (0.16) |
|              | < 30       | 0.9840 (0.07)      | 0.9824 (0.05)    | 0.9564 (0.15)   | 0.9820 (0.07) |
|              | 30-39      | 0.9735 (0.08)      | 0.9714 (0.09)    | 0.9543 (0.11)   | 0.9705 (0.09) |
|              | 40-49      | 0.9548 (0.11)      | 0.9599 (0.10)    | 0.9418 (0.13)   | 0.9548 (0.11) |
|              | 50-59      | 0.9219 (0.17)      | 0.9322 (0.12)    | 0.8810 (0.20)   | 0.9172 (0.16) |
|              | 60-69      | 0.9218 (0.16)      | 0.9107 (0.15)    | 0.8548 (0.20)   | 0.9004 (0.17) |
|              | 70-79      | 0.8775 (0.17)      | 0.8751 (0.18)    | 0.7708 (0.26)   | 0.8487 (0.21) |
|              | 80-89      | 0.7838 (0.26)      | 0.7665 (0.27)    | 0.6510 (0.31)   | 0.7469 (0.28) |
|              | >89        | 0.5910 (0.31)      | 0.6053 (0.33)    | 0.4090 (0.33)   | 0.5773 (0.33) |

**TABLE 3S.** Mean Utilities (SD) in men and women by age groups and social class.

| <b>Sex</b>   | <b>Age</b> | <b>Low social class</b> | <b>Middle social class</b> | <b>High social class</b> | <b>Total</b>  |
|--------------|------------|-------------------------|----------------------------|--------------------------|---------------|
| <b>Men</b>   | Total      | 0.9337 (0.14)           | 0.9487 (0.14)              | 0.9638 (0.12)            | 0.9447 (0.14) |
|              | < 30       | 0.9815 (0.07)           | 0.9841 (0.09)              | 0.9872 (0.05)            | 0.9834 (0.07) |
|              | 30-39      | 0.9685 (0.11)           | 0.9790 (0.08)              | 0.9799 (0.09)            | 0.9748 (0.10) |
|              | 40-49      | 0.9573 (0.11)           | 0.9643 (0.10)              | 0.9745 (0.08)            | 0.9634 (0.10) |
|              | 50-59      | 0.9246 (0.14)           | 0.9430 (0.14)              | 0.9637 (0.12)            | 0.9395 (0.14) |
|              | 60-69      | 0.9245 (0.14)           | 0.9323 (0.15)              | 0.9564 (0.12)            | 0.9332 (0.14) |
|              | 70-79      | 0.8767 (0.18)           | 0.9056 (0.18)              | 0.9300 (0.16)            | 0.8935 (0.18) |
|              | 80-89      | 0.8008 (0.26)           | 0.7930 (0.26)              | 0.8203 (0.25)            | 0.8010 (0.25) |
|              | >89        | 0.6728 (0.27)           | 0.7141 (0.25)              | 0.6979 (0.37)            | 0.6882 (0.27) |
| <b>Women</b> | Total      | 0.8778 (0.20)           | 0.9111 (0.17)              | 0.9344 (0.15)            | 0.8998 (0.18) |
|              | < 30       | 0.9775 (0.07)           | 0.9865 (0.05)              | 0.9786 (0.10)            | 0.9805 (0.07) |
|              | 30-39      | 0.9584 (0.09)           | 0.9712 (0.08)              | 0.9726 (0.06)            | 0.9661 (0.08) |
|              | 40-49      | 0.9357 (0.13)           | 0.9440 (0.11)              | 0.9671 (0.08)            | 0.9459 (0.12) |
|              | 50-59      | 0.8718 (0.19)           | 0.9026 (0.18)              | 0.9341 (0.13)            | 0.8951 (0.18) |
|              | 60-69      | 0.8383 (0.21)           | 0.8809 (0.18)              | 0.9254 (0.11)            | 0.8696 (0.19) |
|              | 70-79      | 0.7970 (0.24)           | 0.8312 (0.20)              | 0.8638 (0.18)            | 0.8155 (0.22) |
|              | 80-89      | 0.6814 (0.29)           | 0.7562 (0.26)              | 0.7128 (0.33)            | 0.7078 (0.29) |
|              | >89        | 0.5725 (0.34)           | 0.5657 (0.35)              | 0.3295 (0.21)            | 0.5397 (0.34) |
| <b>Total</b> | Total      | 0.9045 (0.18)           | 0.9298 (0.16)              | 0.9487 (0.13)            | 0.9216 (0.16) |
|              | < 30       | 0.9795 (0.07)           | 0.9853 (0.07)              | 0.9830 (0.08)            | 0.9820 (0.07) |
|              | 30-39      | 0.9636 (0.10)           | 0.9752 (0.08)              | 0.9761 (0.08)            | 0.9705 (0.09) |
|              | 40-49      | 0.9468 (0.12)           | 0.9545 (0.11)              | 0.9707 (0.08)            | 0.9548 (0.11) |
|              | 50-59      | 0.8971 (0.17)           | 0.9234 (0.16)              | 0.9489 (0.13)            | 0.9172 (0.16) |
|              | 60-69      | 0.8799 (0.19)           | 0.9062 (0.17)              | 0.9403 (0.12)            | 0.9004 (0.17) |
|              | 70-79      | 0.8297 (0.22)           | 0.8636 (0.20)              | 0.8948 (0.17)            | 0.8487 (0.21) |
|              | 80-89      | 0.7312 (0.28)           | 0.7720 (0.26)              | 0.7571 (0.30)            | 0.7469 (0.28) |
|              | >89        | 0.5986 (0.32)           | 0.6002 (0.33)              | 0.4318 (0.31)            | 0.5773 (0.33) |

**TABLE 4S.** Distribution of the sample by BMI category, social class and number of chronic conditions diagnosed.

|                                               | <b>Low<br/>social class</b> | <b>Middle<br/>social class</b> | <b>High<br/>social class</b> | p-value |
|-----------------------------------------------|-----------------------------|--------------------------------|------------------------------|---------|
| <b>BMI &lt; 25</b>                            |                             |                                |                              |         |
| <b>Number of chronic conditions diagnosed</b> |                             |                                |                              |         |
| None                                          | 2,036 (59.0%)               | 1,835 (63.0%)                  | 1,311 (67.4%)                |         |
| One or two                                    | 929 (26.9%)                 | 773 (26.6%)                    | 486 (25.0%)                  |         |
| More than two                                 | 485 (14.1%)                 | 304 (10.4%)                    | 148 (7.6%)                   | < 0.001 |
| <b>BMI 25-30</b>                              |                             |                                |                              |         |
| <b>Number of chronic conditions diagnosed</b> |                             |                                |                              |         |
| None                                          | 1,514 (46.1%)               | 1,274 (52.6%)                  | 706 (57.2%)                  |         |
| One or two                                    | 1,021 (31.1%)               | 735 (30.4%)                    | 367 (29.7%)                  |         |
| More than two                                 | 752 (22.8%)                 | 411 (17.0%)                    | 162 (13.1%)                  | < 0.001 |
| <b>BMI ≥ 30</b>                               |                             |                                |                              |         |
| <b>Number of chronic conditions diagnosed</b> |                             |                                |                              |         |
| None                                          | 654 (34.7%)                 | 364 (38.2%)                    | 165 (45.1%)                  |         |
| One or two                                    | 583 (31.0%)                 | 310 (32.6%)                    | 117 (32.0%)                  |         |
| More than two                                 | 646 (34.3%)                 | 278 (29.2%)                    | 84 (22.9%)                   | < 0.001 |
| <b>Total</b>                                  |                             |                                |                              |         |
| <b>Number of chronic conditions diagnosed</b> |                             |                                |                              |         |
| None                                          | 4,204 (48.8%)               | 3,473 (55.3%)                  | 2,182 (61.5%)                |         |
| One or two                                    | 2,533 (29.4%)               | 1,818 (28.9%)                  | 970 (27.4%)                  |         |
| More than two                                 | 1,883 (21.8%)               | 993 (15.8%)                    | 394 (11.1%)                  | < 0.001 |

**TABLE 5S.** Two-step regression analysis to estimate mean utility values adjusted by age and diagnosis of each specific disease for the total population or by sex.

|                                       |        | <b>Constant</b> | <b>Age</b> | <b>Diagnosis</b> | <b>Sex</b> | <b>Sex*Diagnosis</b> |
|---------------------------------------|--------|-----------------|------------|------------------|------------|----------------------|
| <b>Total population</b>               |        |                 |            |                  |            |                      |
| Acute myocardial infarction           | Step 1 | 0.7416          | -0.0457    | -0.6620          |            |                      |
|                                       | Step 2 | -1.6225         | 0.0188     | 0.2057           |            |                      |
| Other heart diseases                  | Step 1 | 0.7833          | -0.0434    | -0.9131          |            |                      |
|                                       | Step 2 | -1.6374         | 0.0176     | 0.2440           |            |                      |
| Arthrosis, arthritis or rheumatism    | Step 1 | 1.3818          | -0.0341    | -1.6506          |            |                      |
|                                       | Step 2 | -1.7740         | 0.0176     | 0.2545           |            |                      |
| Chronic obstructive pulmonary disease | Step 1 | 0.7798          | -0.0449    | -1.0251          |            |                      |
|                                       | Step 2 | -1.6354         | 0.0186     | 0.2179           |            |                      |
| Diabetes                              | Step 1 | 0.7777          | -0.0441    | -0.6277          |            |                      |
|                                       | Step 2 | -1.6431         | 0.0181     | 0.2304           |            |                      |
| Cirrhosis, hepatic dysfunction        | Step 1 | 0.7415          | -0.0463    | -1.0872          |            |                      |
|                                       | Step 2 | -1.6266         | 0.0191     | 0.4053           |            |                      |
| Mental health diseases                | Step 1 | 1.0298          | -0.0448    | -2.3454          |            |                      |
|                                       | Step 2 | -1.7669         | 0.0194     | 0.4312           |            |                      |
| Stroke                                | Step 1 | 0.7454          | -0.0457    | -1.4934          |            |                      |
|                                       | Step 2 | -1.6316         | 0.0183     | 0.5691           |            |                      |
| <b>Population by sex</b>              |        |                 |            |                  |            |                      |
| Acute myocardial infarction           | Step 1 | 1.0873          | -0.0453    | -0.7134          | -0.6383    | -0.7915              |
|                                       | Step 2 | -1.6996         | 0.0186     | 0.1591           | 0.1240     | 0.2095               |
| Other heart diseases                  | Step 1 | 1.1317          | -0.0431    | -0.9750          | -0.6448    | 0.0197               |
|                                       | Step 2 | -1.6969         | 0.0173     | 0.1498           | 0.0983     | 0.1665               |
| Arthrosis, arthritis or rheumatism    | Step 1 | 1.5376          | -0.0343    | -1.4855          | -0.3343    | -0.1908              |
|                                       | Step 2 | -1.7536         | 0.0175     | 0.1404           | -0.0391    | 0.1769               |
| Chronic obstructive pulmonary disease | Step 1 | 1.1230          | -0.0447    | -1.0101          | -0.6354    | -0.1339              |
|                                       | Step 2 | -1.7094         | 0.0184     | 0.1710           | 0.1180     | 0.1079               |
| Diabetes                              | Step 1 | 1.1236          | -0.0437    | -0.6492          | -0.6371    | -0.0972              |
|                                       | Step 2 | -1.7097         | 0.0178     | 0.1697           | 0.1086     | 0.1161               |
| Cirrhosis, hepatic dysfunction        | Step 1 | 1.0782          | -0.0461    | -1.1140          | -0.6284    | -0.1117              |
|                                       | Step 2 | -1.7071         | 0.0189     | 0.5006           | 0.1301     | -0.1506              |
| Mental health diseases                | Step 1 | 1.2663          | -0.0448    | -2.3730          | -0.4673    | 0.1592               |
|                                       | Step 2 | -1.8047         | 0.0193     | 0.4550           | 0.0669     | -0.0466              |
| Stroke                                | Step 1 | 1.0877          | -0.0455    | -1.6303          | -0.6374    | 0.1133               |
|                                       | Step 2 | -1.7119         | 0.0180     | 0.5232           | 0.1305     | 0.1230               |

Step 1: Logistic regression; Step 2: Generalized linear regression (family: gamma, link: logarithmic).

**TABLE 6S.** Two-step regression analysis to estimate mean utility values adjusted by age and diagnosis of each specific disease for the total population or by social class.

|                                       |        | Constant | Age     | Middle social class | High social class | Diagnosis | Middle social class *Diagnosis | High social class *Diagnosis |
|---------------------------------------|--------|----------|---------|---------------------|-------------------|-----------|--------------------------------|------------------------------|
| <b>Population by social class</b>     |        |          |         |                     |                   |           |                                |                              |
| Acute myocardial infarction           | Step 1 | 0.5408   | -0.0453 | 0.2839              | 0.5652            | -0.9742   | 0.4810                         | 1.0271                       |
|                                       | Step 2 | -1.6379  | 0.0158  | -0.0776             | -0.1348           | 0.1492    | 0.0454                         | 0.2843                       |
| Other heart diseases                  | Step 1 | 0.5827   | -0.0430 | 0.2783              | 0.5707            | -0.9730   | 0.1933                         | 0.0777                       |
|                                       | Step 2 | -1.6490  | 0.0146  | -0.0814             | -0.1555           | 0.2009    | 0.0424                         | 0.1928                       |
| Arthrosis, arthritis or rheumatism    | Step 1 | 1.2066   | -0.0338 | 0.2622              | 0.4249            | -1.6447   | -0.0331                        | 0.1398                       |
|                                       | Step 2 | -1.8371  | 0.0144  | 0.0233              | -0.0823           | 0.3101    | -0.1265                        | -0.0279                      |
| Chronic obstructive pulmonary disease | Step 1 | 0.5842   | -0.0445 | 0.2698              | 0.5532            | -1.0693   | 0.1826                         | 0.2345                       |
|                                       | Step 2 | -1.6599  | 0.0156  | -0.0626             | -0.1147           | 0.2369    | -0.0492                        | 0.0196                       |
| Diabetes                              | Step 1 | 0.5852   | -0.0438 | 0.2673              | 0.5335            | -0.7038   | 0.1872                         | 0.4328                       |
|                                       | Step 2 | -1.6655  | 0.0150  | -0.0606             | -0.1181           | 0.2223    | -0.0387                        | 0.0987                       |
| Cirrhosis, hepatic dysfunction        | Step 1 | 0.5333   | -0.0458 | 0.2953              | 0.5873            | -1.1531   | -0.0050                        | 0.3149                       |
|                                       | Step 2 | -1.6437  | 0.0160  | -0.0801             | -0.1216           | 0.3875    | 0.1104                         | -0.1213                      |
| Mental health diseases                | Step 1 | 0.8494   | -0.0444 | 0.2276              | 0.5452            | -2.3496   | 0.2270                         | -0.3049                      |
|                                       | Step 2 | -1.8440  | 0.0163  | -0.0229             | -0.0743           | 0.5486    | -0.0742                        | -0.0671                      |
| Stroke                                | Step 1 | 0.5334   | -0.0452 | 0.3010              | 0.5991            | -1.2226   | -0.5603                        | -0.5274                      |
|                                       | Step 2 | -1.6423  | 0.0154  | -0.0865             | -0.1399           | 0.4498    | 0.1468                         | 0.0701                       |

Step 1: Logistic regression; Step 2: Generalized linear regression (family: gamma, link: logarithmic).
